# Supplementary material
Source: PubMed Central journal article supplement (PMC8009616)
Supplement: mmc1.pdf [file mmc1.pdf]

# THE LANCET

## Rheumatology

### Supplementary appendix

This appendix formed part of the original submission and has been peer reviewed.  
We post it as supplied by the authors.

Supplement to: Terracina K A, Tan F K. Flare of rheumatoid arthritis after COVID-19  
vaccination. *Lancet Rheumatol* 2021; published online March 30.  
[https://doi.org/10.1016/S2665-9913\(21\)00108-9](https://doi.org/10.1016/S2665-9913(21)00108-9).

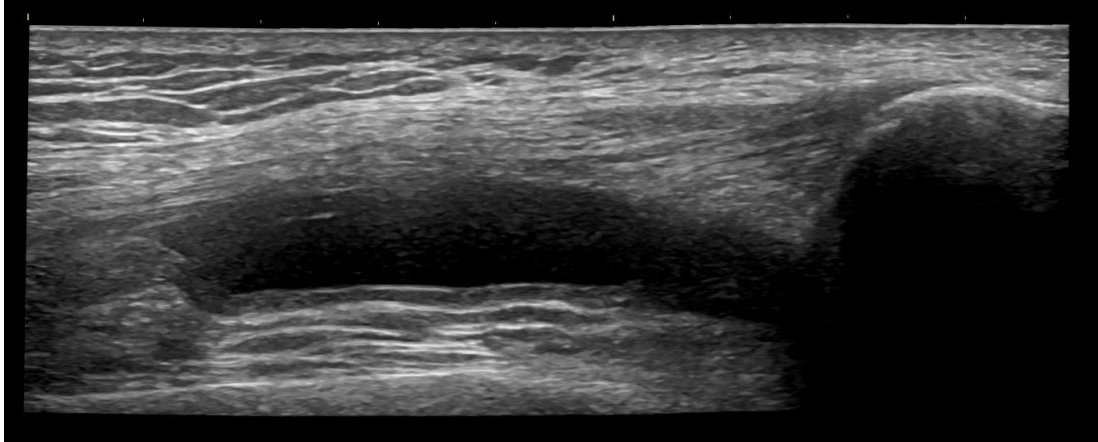

Right anterior suprapatellar knee, long axis. Extent of effusion deep to quadriceps tendon.

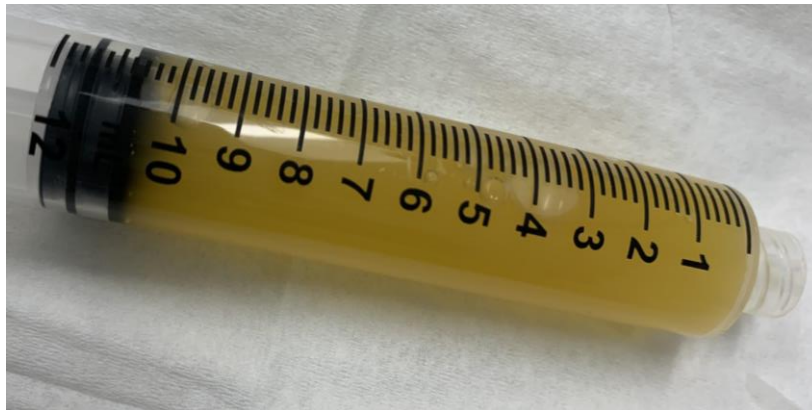

Straw colored aspirate from right knee.
